# Supplementary material for: Hierarchical mesoporous anatase TiO2nanostructures with efficient photocatalytic and photovoltaic performances
Source: Royal Society of Chemistry journal article supplement (doi:10.1039/c5ta01681a), 2015-01-01
Supplement: c5ta01681a1.pdf [file c5ta01681a1.pdf]

†Electronic Supplementary Information

## Hierarchical mesoporous anatase TiO<sub>2</sub> nanostructures with efficient photocatalytic and photovoltaic performances

Hyung-Bae Kim,<sup>a</sup> Harkjin Kim,<sup>b</sup> Wan In Lee,<sup>b</sup> and Du-Jeon Jang<sup>\*a</sup>

<sup>a</sup>Department of Chemistry, Seoul National University, NS60, Seoul 151-747, Korea

<sup>b</sup>Department of Chemistry, Inha University, Incheon 402-751, Korea

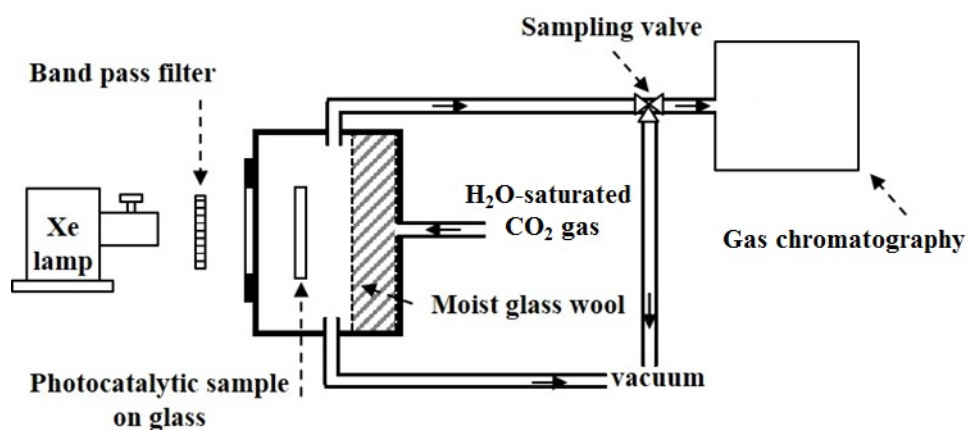

**Fig. S1** Illustration of a homemade gas-tight reactor for photocatalytic CO<sub>2</sub> reduction.

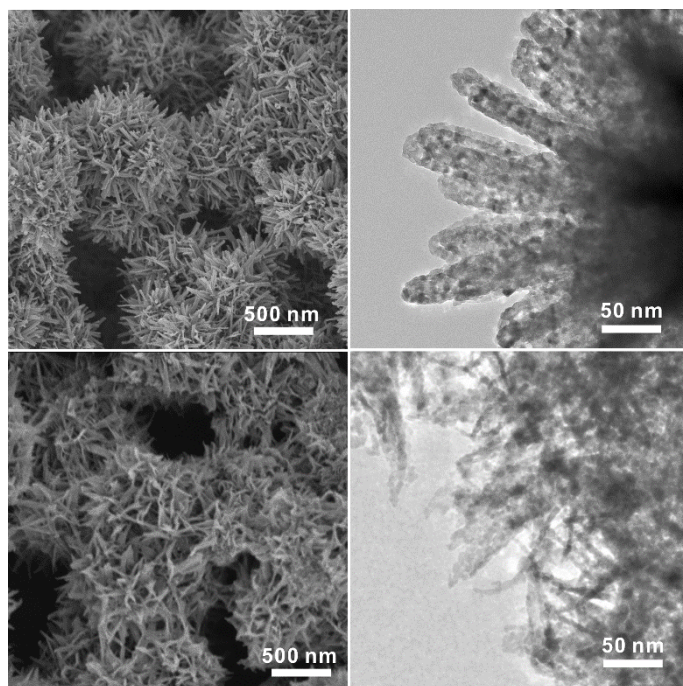

**Fig. S2** SEM (left) and TEM (right) images of anatase  $\text{TiO}_2$  nanostructures A40 (top) and A85 (bottom).

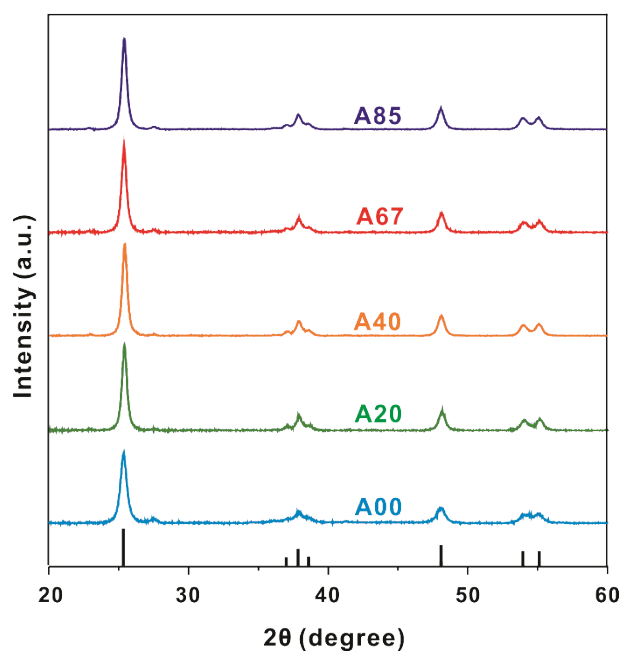

**Fig. S3** HRXRD patterns of indicated anatase  $\text{TiO}_2$  crystals. The standard diffraction pattern of anatase  $\text{TiO}_2$  (JCPDS card no. 84-1286) is also shown in the bottom.

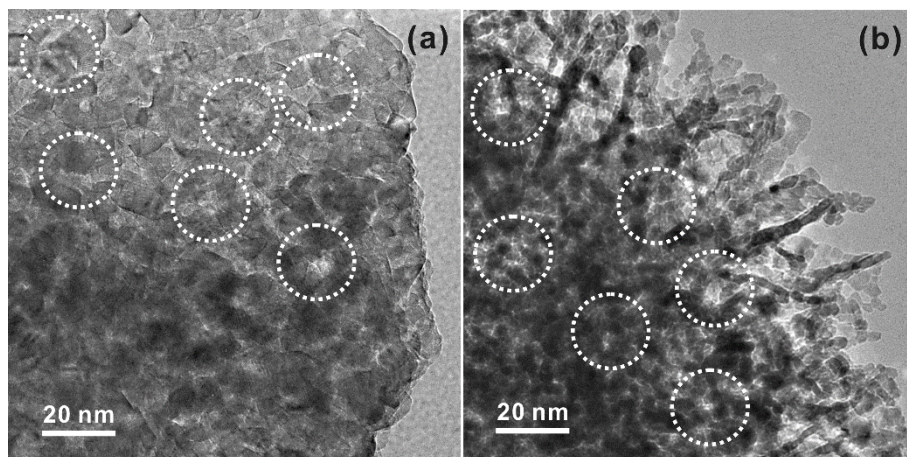

**Fig. S4** TEM images of the mesoporous surfaces of anatase TiO<sub>2</sub> nanostructures A20 (a) and A67 (b). Circles indicate multiple pores.

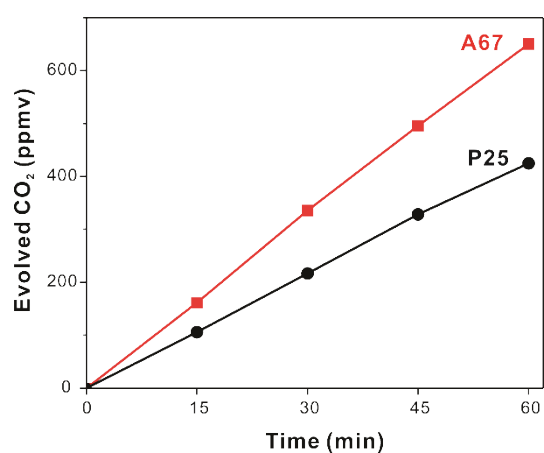

**Fig. S5** Photocatalytic oxidation curves of isopropanol by using anatase TiO<sub>2</sub> crystals A67 and commercial TiO<sub>2</sub> Degussa P25. The amounts of evolved CO<sub>2</sub> were monitored from the photocatalytic oxidation of isopropanol as a function of UV-visible irradiation time.

**Table S1** Photocatalytic performances of TiO<sub>2</sub> nanostructures

| Sample | Evolved CO <sub>2</sub> (ppmv min <sup>-1</sup> ) | Evolved CH <sub>3</sub> OH (ppmv min <sup>-1</sup> ) |
|--------|---------------------------------------------------|------------------------------------------------------|
| A00    | 1.85                                              | -                                                    |
| A20    | 8.07                                              | -                                                    |
| A40    | 9.28                                              | -                                                    |
| A67    | 10.23                                             | 0.31                                                 |
| P25    | 7.10                                              | 0.10                                                 |

**Table S2** Photovoltaic operation parameters of DSSCs without wearing a light mask produced with anatase TiO<sub>2</sub> nanostructures

| Sample | V <sub>oc</sub> (mV) | J <sub>sc</sub> (mA/cm <sup>2</sup> ) | Fill Factor (%) | Efficiency (%) |
|--------|----------------------|---------------------------------------|-----------------|----------------|
| A00    | 820.92               | 7.01                                  | 68.51           | 3.95           |
| A20    | 826.00               | 7.98                                  | 69.05           | 4.56           |
| A40    | 827.90               | 8.77                                  | 68.78           | 4.99           |
| A67    | 784.61               | 11.7                                  | 69.77           | 6.39           |

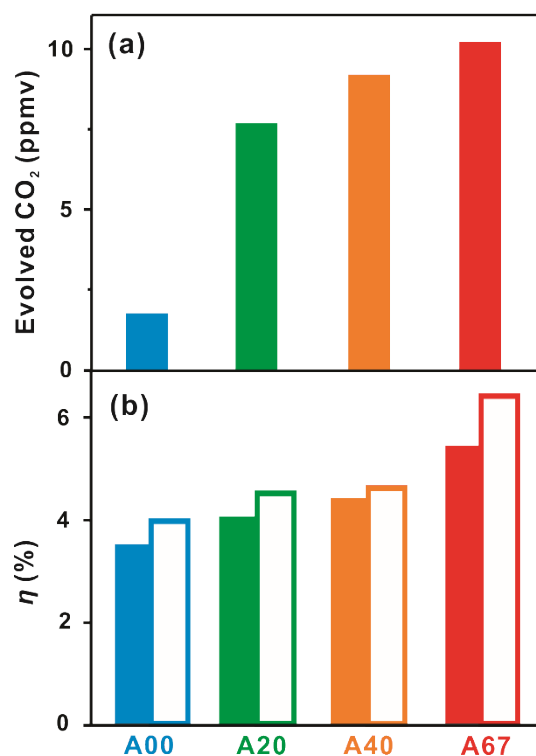

**Fig. S6** Photocatalytic (a) and photovoltaic (b) performances of as-synthesized anatase TiO<sub>2</sub> crystals. The amounts of evolved CO<sub>2</sub> were monitored from the photocatalytic oxidation of isopropanol under UV-visible irradiation for 60 min, and the photovoltaic conversion efficiencies ( $\eta$ ) of DSSCs were measured with (closed) and without (open) a light-shading mask.

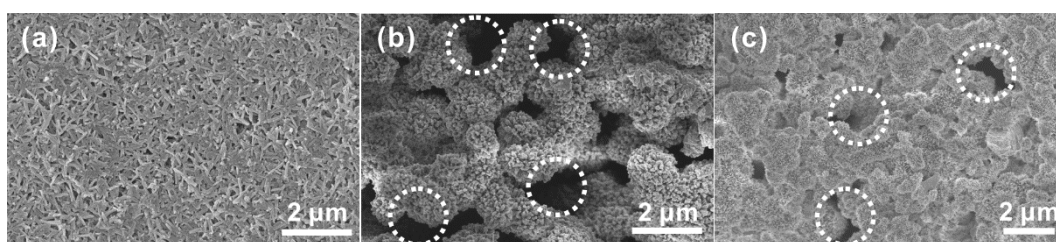

**Fig. S7** SEM images of the film surfaces of anatase TiO<sub>2</sub> nanostructures A00 (a), A20 (b), and A67 (c).
